# Supplementary material for: Development and Validation of a Deep Learning Model for Non–Small Cell Lung Cancer Survival
Source: PubMed Central journal article supplement (PMC7272121; doi:10.1001/jamanetworkopen.2020.5842), 2020-06-03
Supplement: jamanetwopen-3-e205842-s001.pdf [file jamanetwopen-3-e205842-s001.pdf]

## Supplementary Online Content

She Y, Jin Z, Wu J, et al. Development and validation of a deep learning model for non-small cell lung cancer survival. *JAMA Netw Open*. 2020;3(6):e205842.  
doi:10.1001/jamanetworkopen.2020.5842

### **eMethods.**

**eTable 1.** All Clinical Features Integrated in the Model

**eTable 2.** Characteristics of Patients in the Training Dataset of Survival Analysis

**eTable 3.** Characteristics of Patients in the Test Dataset of Survival Analysis

**eTable 4.** Feature Component Weightings in the DeepSurv Model

**eTable 5.** Survival Predictors in Cox PH Model

**eFigure 1.** Flow chart of datasets construction. (A) SEER dataset, (B) CHINA dataset

**eFigure 2.** Training curves of networks in the survival dataset of SEER database (A), lobectomy dataset (B), and sublobar resection dataset (C)

**eFigure 3.** Lung Cancer–Specific Survival Recommendation Comparisons of SEER Data set (A), SEER Lobectomy Test Data set (B), and SEER Sublobar Resection Test Data set (C); Lung Cancer–Specific Survival Recommendation Comparisons of CHINA Data set (D), CHINA Lobectomy Test Data set (E), and CHINA sublobar Resection Test Data set (F)

This supplementary material has been provided by the authors to give readers additional information about their work.

## eMethods.

### 1 Survival data

Survival data consists of three parts: patient information  $X$ , a failure event time  $T$ , and an event label  $E$ . If a failure is observed, the failure time  $T$  is the duration between the time in which the patient information was collected and the time of the failure occurring, the event label equals to 1. If no failure is observed, the failure time  $T$  is the duration between the information collected time and the last contact time with the patient, the event label is 0.

### 2 Survival Analysis Model

We use deep feed-forward neural network and the Cox proportional hazards model in survival analysis.

#### 2.1 The Cox Proportional Hazards Model

The Cox proportional hazards model is a typical method for individual's survival analysis based on hazards function. Specially, the hazard function  $\lambda(t)$  is the probability that an individual will survival up to time  $t$  and pass out between time  $t$  and time  $t + \delta$ .

$$\lambda(t) = \lim_{\delta \rightarrow 0} \frac{Pr(t \leq T < t + \delta | T \geq t)}{\delta}$$

The Cox model assumes that the hazards function can be modeled as a baseline hazards function  $\lambda_0(t)$  and the risk level  $l_x = e^{h(x)}$ .  $h(x)$  is denoted as the log-risk function. The form of the hazards function is as follow:

$$\lambda(t|x) = \lambda_0(t) \cdot e^{h(x)}$$

#### 2.2 The Deep Neural Network Structure

We further apply deep learning technique in Cox proportional hazards analysis. A deep neural network is trained to model the log-risk function  $h(x)$  in the hazards function. The network takes patient's information  $x$  as input. Several

fully-connected layers followed by the dropout layers embed the input into a hidden vector. After that, the hidden vector is fed into the output layer which contains a linear activation function to estimate the log-risk function.

The loss function of the model is set to be the Cox partial likelihood with regularization:

$$l(\theta) := -\frac{1}{N_{E=1}} \sum_{i:E_i=1} \left( h_{\theta}(x_i) - \log \sum_{j \in \mathfrak{R}(T_i)} e^{h_{\theta}(x_j)} \right) + \alpha \cdot \|\theta\|_2^2$$

where  $\theta$  is the weights in neural network,  $\alpha$  is the regularization parameter,  $h_{\theta}(x)$  is the output of the network,  $N_{E=1}$  is the number of patients with observable failures, and  $\mathfrak{R}(t) = \{i : T_i > t\}$  is the set of patient who are at risk of failure at time  $t$ . Adaptive Moment Estimation (Adam) for the gradient descent algorithm is applied to optimize the loss function.

### 2.3 The Survival Probability Curve

According to assumption of the Cox model, a baseline hazards function needs to be estimated for modeling individual's survival probability curve as follow:

$$\lambda_0(t) = 1 - \frac{\sum_{i \in \mathfrak{S}(t)} 1}{\sum_{i \in \mathfrak{S}(t)} 1 + \sum_{i \in \mathfrak{R}(t)} e^{h_{\theta}(x_i)}}$$

where  $\mathfrak{S}(t) = \{i : T_i \leq t; E_i = 1\}$

## 3 Treatment Recommendation

In clinical scenario, the treatment patients undergo has an important impact on patients' survival probability. In general, we consider that each treatment  $k$  has its own risk function  $e^{h_k(x)}$ . Thus, the hazard function of treatment  $k$  is:

$$\lambda(t; x | Treatment = k) = \lambda_0(t) \cdot e^{h_k(x)}$$

Considering two treatments  $k_i$  and  $k_j$ , we can compare the survival curves of treatment  $k_i$  and  $k_j$  to explore the probability difference between these two treatment at multiple time points.



**eTable 2.** Characteristics of Patients in the Training Dataset of Survival Analysis

| Stage                                   | IA1    |       | IA2    |       | IA3    |       | IB     |       | IIA   |       | IIB   |       | IIIA   |       | IIIB  |       | IIIC  |       | IVA    |       | IVB    |       | total  |       |
|-----------------------------------------|--------|-------|--------|-------|--------|-------|--------|-------|-------|-------|-------|-------|--------|-------|-------|-------|-------|-------|--------|-------|--------|-------|--------|-------|
|                                         | median | range | median | range | median | range | median | range | medi  | range | medi  | range | median | range | media | range | media | range | median | range | median | range | median | range |
| Age at diagnosis                        | 67     | 36-90 | 67     | 29-90 | 69     | 31-92 | 69     | 32-92 | 69    | 35-86 | 67    | 30-95 | 67     | 29-90 | 66    | 34-89 | 64    | 46-85 | 65     | 28-84 | 61     | 50-78 | 68     | 28-95 |
|                                         | count  | %     | count  | %     | count  | %     | count  | %     | count | %     | count | %     | count  | %     | count | %     | count | %     | count  | %     | count  | %     | count  | %     |
| Sex                                     |        |       |        |       |        |       |        |       |       |       |       |       |        |       |       |       |       |       |        |       |        |       |        |       |
| Female                                  | 324    | 62.5  | 1585   | 57.5  | 1079   | 56.7  | 1158   | 51.3  | 180   | 45    | 1025  | 44.9  | 908    | 47    | 213   | 42.9  | 5     | 29.4  | 175    | 50.7  | 5      | 62.5  | 6657   | 51.6  |
| Male                                    | 194    | 37.5  | 1172   | 42.5  | 823    | 43.3  | 1098   | 48.7  | 220   | 55    | 1258  | 55.1  | 1022   | 53    | 283   | 57.1  | 12    | 70.6  | 170    | 49.3  | 3      | 37.5  | 6255   | 48.4  |
| Histologic Type 2                       |        |       |        |       |        |       |        |       |       |       |       |       |        |       |       |       |       |       |        |       |        |       |        |       |
| AD                                      | 410    | 79.2  | 2110   | 76.5  | 1347   | 70.8  | 1492   | 66.1  | 223   | 55.8  | 1384  | 60.6  | 1245   | 64.5  | 307   | 61.9  | 10    | 58.8  | 260    | 75.4  | 6      | 75    | 8794   | 68.1  |
| SD                                      | 108    | 20.8  | 647    | 23.5  | 555    | 29.2  | 764    | 33.9  | 177   | 44.3  | 899   | 39.4  | 685    | 35.5  | 189   | 38.1  | 7     | 41.2  | 85     | 24.6  | 2      | 25    | 4118   | 31.9  |
| Marital status at diagnosis             |        |       |        |       |        |       |        |       |       |       |       |       |        |       |       |       |       |       |        |       |        |       |        |       |
| un-married                              | 203    | 39.2  | 1149   | 41.7  | 805    | 42.3  | 970    | 43    | 163   | 40.8  | 931   | 40.8  | 753    | 39    | 191   | 38.5  | 4     | 23.5  | 133    | 38.6  | 2      | 25    | 5304   | 41.1  |
| married                                 | 315    | 60.8  | 1608   | 58.3  | 1097   | 57.7  | 1286   | 57    | 237   | 59.3  | 1352  | 59.2  | 1177   | 61    | 305   | 61.5  | 13    | 76.5  | 212    | 61.4  | 6      | 75    | 7608   | 58.9  |
| T                                       |        |       |        |       |        |       |        |       |       |       |       |       |        |       |       |       |       |       |        |       |        |       |        |       |
| T1a                                     | 518    | 100   | 0      | 0     | 0      | 0     | 0      | 0     | 0     | 0     | 22    | 1     | 21     | 1.1   | 0     | 0     | 0     | 0     | 2      | 0.6   | 0      | 0     | 563    | 4.4   |
| T1b                                     | 0      | 0     | 2757   | 100   | 0      | 0     | 0      | 0     | 0     | 0     | 219   | 9.6   | 146    | 7.6   | 5     | 1     | 0     | 0     | 29     | 8.4   | 0      | 0     | 3156   | 24.4  |
| T1c                                     | 0      | 0     | 0      | 0     | 1902   | 100   | 0      | 0     | 0     | 0     | 217   | 9.5   | 182    | 9.4   | 4     | 0.8   | 0     | 0     | 36     | 10.4  | 1      | 12.5  | 2342   | 18.1  |
| T2a                                     | 0      | 0     | 0      | 0     | 0      | 0     | 2256   | 100   | 0     | 0     | 499   | 21.9  | 425    | 22    | 4     | 0.8   | 0     | 0     | 73     | 21.2  | 1      | 12.5  | 3258   | 25.2  |
| T2b                                     | 0      | 0     | 0      | 0     | 0      | 0     | 0      | 0     | 400   | 100   | 111   | 4.9   | 71     | 3.7   | 1     | 0.2   | 0     | 0     | 11     | 3.2   | 0      | 0     | 594    | 4.6   |
| T3                                      | 0      | 0     | 0      | 0     | 0      | 0     | 0      | 0     | 0     | 0     | 1214  | 53.2  | 381    | 19.7  | 284   | 57.3  | 11    | 64.7  | 102    | 29.6  | 2      | 25    | 1994   | 15.4  |
| T4                                      | 0      | 0     | 0      | 0     | 0      | 0     | 0      | 0     | 0     | 0     | 1     | 0     | 704    | 36.5  | 198   | 39.9  | 6     | 35.3  | 92     | 26.7  | 4      | 50    | 1005   | 7.8   |
| N                                       |        |       |        |       |        |       |        |       |       |       |       |       |        |       |       |       |       |       |        |       |        |       |        |       |
| N0                                      | 518    | 100   | 2757   | 100   | 1902   | 100   | 2256   | 100   | 400   | 100   | 1216  | 53.3  | 484    | 25.1  | 0     | 0     | 0     | 0     | 177    | 51.3  | 2      | 25    | 9712   | 75.2  |
| N1                                      | 0      | 0     | 0      | 0     | 0      | 0     | 0      | 0     | 0     | 0     | 1067  | 46.7  | 601    | 31.1  | 0     | 0     | 0     | 0     | 63     | 18.3  | 1      | 12.5  | 1732   | 13.4  |
| N2                                      | 0      | 0     | 0      | 0     | 0      | 0     | 0      | 0     | 0     | 0     | 0     | 0     | 845    | 43.8  | 482   | 97.2  | 0     | 0     | 92     | 26.7  | 3      | 37.5  | 1422   | 11    |
| N3                                      | 0      | 0     | 0      | 0     | 0      | 0     | 0      | 0     | 0     | 0     | 0     | 0     | 0      | 0     | 14    | 2.8   | 17    | 100   | 13     | 3.8   | 2      | 25    | 46     | 0.4   |
| M                                       |        |       |        |       |        |       |        |       |       |       |       |       |        |       |       |       |       |       |        |       |        |       |        |       |
| M0                                      | 518    | 100   | 2757   | 100   | 1902   | 100   | 2256   | 100   | 400   | 100   | 2283  | 100   | 1930   | 100   | 496   | 100   | 17    | 100   | 0      | 0     | 0      | 0     | 12559  | 97.3  |
| M1a                                     | 0      | 0     | 0      | 0     | 0      | 0     | 0      | 0     | 0     | 0     | 0     | 0     | 0      | 0     | 0     | 0     | 0     | 0     | 143    | 41.4  | 0      | 0     | 143    | 1.1   |
| M1b                                     | 0      | 0     | 0      | 0     | 0      | 0     | 0      | 0     | 0     | 0     | 0     | 0     | 0      | 0     | 0     | 0     | 0     | 202   | 58.6   | 0     | 0      | 202   | 1.6    |       |
| M1c                                     | 0      | 0     | 0      | 0     | 0      | 0     | 0      | 0     | 0     | 0     | 0     | 0     | 0      | 0     | 0     | 0     | 0     | 0     | 0      | 0     | 8      | 100   | 8      | 0.1   |
| LCCS                                    |        |       |        |       |        |       |        |       |       |       |       |       |        |       |       |       |       |       |        |       |        |       |        |       |
| Alive                                   | 496    | 95.8  | 2577   | 93.5  | 1701   | 89.4  | 1950   | 86.4  | 340   | 85    | 1758  | 77    | 1303   | 67.5  | 279   | 56.3  | 7     | 41.2  | 169    | 49    | 1      | 12.5  | 10581  | 81.9  |
| dead                                    | 22     | 4.2   | 180    | 6.5   | 201    | 10.6  | 306    | 13.6  | 60    | 15    | 525   | 23    | 627    | 32.5  | 217   | 43.8  | 10    | 58.8  | 176    | 51    | 7      | 87.5  | 2331   | 18.1  |
| Pleural/Elastic Layer Invasion          |        |       |        |       |        |       |        |       |       |       |       |       |        |       |       |       |       |       |        |       |        |       |        |       |
| PL0                                     | 518    | 100   | 2757   | 100   | 1902   | 100   | 1369   | 60.7  | 399   | 99.8  | 1715  | 75.1  | 1450   | 75.1  | 327   | 65.9  | 14    | 82.4  | 239    | 69.3  | 8      | 100   | 10698  | 82.9  |
| PL1                                     | 0      | 0     | 0      | 0     | 0      | 0     | 489    | 21.7  | 1     | 0.3   | 221   | 9.7   | 181    | 9.4   | 67    | 13.5  | 1     | 5.9   | 37     | 10.7  | 0      | 0     | 997    | 7.7   |
| PL2                                     | 0      | 0     | 0      | 0     | 0      | 0     | 398    | 17.6  | 0     | 0     | 157   | 6.9   | 194    | 10.1  | 57    | 11.5  | 1     | 5.9   | 43     | 12.5  | 0      | 0     | 850    | 6.6   |
| PL3                                     | 0      | 0     | 0      | 0     | 0      | 0     | 0      | 0     | 0     | 0     | 190   | 8.3   | 105    | 5.4   | 45    | 9.1   | 1     | 5.9   | 26     | 7.5   | 0      | 0     | 367    | 2.8   |
| Separate Tumor Nodules                  |        |       |        |       |        |       |        |       |       |       |       |       |        |       |       |       |       |       |        |       |        |       |        |       |
| 1                                       | 518    | 100   | 2757   | 100   | 1902   | 100   | 2255   | 100   | 400   | 100   | 1903  | 83.4  | 1617   | 83.8  | 348   | 70.2  | 14    | 82.4  | 241    | 69.9  | 3      | 37.5  | 11958  | 92.6  |
| 2                                       | 0      | 0     | 0      | 0     | 0      | 0     | 0      | 0     | 0     | 0     | 0     | 0     | 158    | 8.2   | 47    | 9.5   | 0     | 0     | 42     | 12.2  | 3      | 37.5  | 250    | 1.9   |
| 3                                       | 0      | 0     | 0      | 0     | 0      | 0     | 1      | 0     | 0     | 0     | 380   | 16.6  | 126    | 6.5   | 91    | 18.3  | 2     | 11.8  | 45     | 13    | 1      | 12.5  | 646    | 5     |
| 4                                       | 0      | 0     | 0      | 0     | 0      | 0     | 0      | 0     | 0     | 0     | 0     | 0     | 29     | 1.5   | 10    | 2     | 1     | 5.9   | 17     | 4.9   | 1      | 12.5  | 58     | 0.4   |
| Surgery to Other Regional/Distant Sites |        |       |        |       |        |       |        |       |       |       |       |       |        |       |       |       |       |       |        |       |        |       |        |       |
| None                                    | 515    | 99.4  | 2748   | 99.7  | 1892   | 99.5  | 2236   | 99.1  | 399   | 99.8  | 2252  | 98.6  | 1885   | 97.7  | 480   | 96.8  | 14    | 94.1  | 275    | 79.7  | 7      | 87.5  | 12705  | 98.4  |
| Distant                                 | 0      | 0     | 4      | 0.1   | 4      | 0.2   | 7      | 0.3   | 0     | 0     | 11    | 0.5   | 11     | 0.6   | 4     | 0.8   | 0     | 0     | 64     | 18.6  | 1      | 12.5  | 106    | 0.8   |
| Regional                                | 3      | 0.6   | 5      | 0.2   | 6      | 0.3   | 13     | 0.6   | 1     | 0.3   | 20    | 0.9   | 34     | 1.8   | 12    | 2.4   | 1     | 5.9   | 6      | 1.7   | 0      | 0     | 101    | 0.8   |

**eTable 3.** Characteristics of Patients in the Test Dataset of Survival Analysis

| Stage                                   | IA1    |       | IA2    |       | IA3    |       | IB     |       | IIA    |       | IIB    |       | IIIA   |       | IIIB   |       | IIIC   |       | IVA    |       | IVB    |       | total  |       |
|-----------------------------------------|--------|-------|--------|-------|--------|-------|--------|-------|--------|-------|--------|-------|--------|-------|--------|-------|--------|-------|--------|-------|--------|-------|--------|-------|
|                                         | median | range | median | range | median | range | median | range | median | range | median | range | median | range | median | range | median | range | median | range | median | range | median | range |
| Age at diagnosis                        | count  | %     | count  | %     | count  | %     | count  | %     | count  | %     | count  | %     | count  | %     | count  | %     | count  | %     | count  | %     | count  | %     | count  | %     |
| Sex                                     |        |       |        |       |        |       |        |       |        |       |        |       |        |       |        |       |        |       |        |       |        |       |        |       |
| Female                                  | 82     | 66.1  | 407    | 57.2  | 267    | 52    | 278    | 50.9  | 35     | 35.4  | 267    | 50.1  | 203    | 41.7  | 51     | 44    | 2      | 66.7  | 45     | 48.4  | 2      | 66.7  | 1639   | 50.8  |
| Male                                    | 42     | 33.9  | 304    | 42.8  | 246    | 48    | 268    | 49.1  | 64     | 64.6  | 266    | 49.9  | 284    | 58.3  | 65     | 56    | 1      | 33    | 48     | 51.6  | 1      | 33.3  | 1589   | 49.2  |
| Histologic Type 2                       |        |       |        |       |        |       |        |       |        |       |        |       |        |       |        |       |        |       |        |       |        |       |        |       |
| AD                                      | 99     | 79.8  | 541    | 76.1  | 369    | 71.9  | 380    | 69.6  | 48     | 48.5  | 346    | 64.9  | 319    | 65.5  | 73     | 62.9  | 2      | 66.7  | 64     | 68.8  | 2      | 66.7  | 2243   | 69.5  |
| SD                                      | 25     | 20.2  | 107    | 23.9  | 144    | 28.1  | 166    | 30.4  | 51     | 51.5  | 187    | 35.1  | 168    | 34.5  | 43     | 37.1  | 1      | 33.3  | 29     | 31.2  | 1      | 33.3  | 985    | 30.5  |
| Marital status at diagnosis             |        |       |        |       |        |       |        |       |        |       |        |       |        |       |        |       |        |       |        |       |        |       |        |       |
| married                                 | 59     | 47.6  | 308    | 43.3  | 294    | 57.3  | 305    | 55.9  | 40     | 40.4  | 295    | 55.3  | 295    | 60.6  | 69     | 59.5  | 1      | 33.3  | 56     | 60.2  | 1      | 33.3  | 1843   | 57.1  |
| un-married                              | 65     | 52.4  | 403    | 56.7  | 219    | 42.7  | 241    | 44.1  | 59     | 59.6  | 238    | 44.7  | 192    | 39.4  | 47     | 40.5  | 2      | 66.7  | 37     | 39.8  | 2      | 66.7  | 1385   | 42.9  |
| T                                       |        |       |        |       |        |       |        |       |        |       |        |       |        |       |        |       |        |       |        |       |        |       |        |       |
| T1a                                     | 124    | 100   | 0      | 0     | 0      | 0     | 0      | 0     | 0      | 0     | 7      | 1.3   | 7      | 1.4   | 0      | 0     | 0      | 0     | 4      | 1.1   | 0      | 0     | 139    | 4.3   |
| T1b                                     | 0      | 0     | 711    | 100   | 0      | 0     | 0      | 0     | 0      | 0     | 39     | 7.3   | 43     | 8.8   | 2      | 1.7   | 0      | 0     | 9      | 9.7   | 0      | 0     | 804    | 24.9  |
| T1c                                     | 0      | 0     | 0      | 0     | 513    | 100   | 0      | 0     | 0      | 0     | 65     | 12.2  | 52     | 10.7  | 2      | 1.7   | 0      | 0     | 9      | 9.7   | 0      | 0     | 641    | 19.9  |
| T2a                                     | 0      | 0     | 0      | 0     | 0      | 0     | 546    | 100   | 0      | 0     | 126    | 23.6  | 97     | 19.9  | 2      | 1.7   | 0      | 0     | 20     | 21.5  | 0      | 0     | 791    | 24.5  |
| T2b                                     | 0      | 0     | 0      | 0     | 0      | 0     | 0      | 0     | 99     | 100   | 18     | 3.4   | 19     | 3.9   | 0      | 0     | 0      | 0     | 5      | 5.4   | 0      | 0     | 141    | 4.4   |
| T3                                      | 0      | 0     | 0      | 0     | 0      | 0     | 0      | 0     | 0      | 0     | 278    | 52.2  | 76     | 15.6  | 67     | 57.8  | 1      | 33.3  | 22     | 23.7  | 1      | 33.3  | 445    | 13.8  |
| T4                                      | 0      | 0     | 0      | 0     | 0      | 0     | 0      | 0     | 0      | 0     | 0      | 0     | 193    | 39.6  | 43     | 37.1  | 2      | 66.7  | 27     | 29    | 2      | 66.7  | 267    | 8.3   |
| N                                       |        |       |        |       |        |       |        |       |        |       |        |       |        |       |        |       |        |       |        |       |        |       |        |       |
| N0                                      | 124    | 100   | 711    | 100   | 513    | 100   | 546    | 100   | 99     | 100   | 278    | 52.2  | 120    | 24.6  | 0      | 0     | 0      | 0     | 47     | 50.5  | 1      | 33.3  | 2439   | 75.6  |
| N1                                      | 0      | 0     | 0      | 0     | 0      | 0     | 0      | 0     | 0      | 0     | 255    | 47.8  | 149    | 30.6  | 0      | 0     | 0      | 0     | 13     | 14    | 1      | 33.3  | 418    | 12.9  |
| N2                                      | 0      | 0     | 0      | 0     | 0      | 0     | 0      | 0     | 0      | 0     | 0      | 0     | 218    | 44.8  | 110    | 94.8  | 0      | 0     | 27     | 29    | 1      | 33.3  | 356    | 11    |
| N3                                      | 0      | 0     | 0      | 0     | 0      | 0     | 0      | 0     | 0      | 0     | 0      | 0     | 0      | 0     | 6      | 5.2   | 4      | 100   | 6      | 6.5   | 0      | 0     | 15     | 0.5   |
| M                                       |        |       |        |       |        |       |        |       |        |       |        |       |        |       |        |       |        |       |        |       |        |       |        |       |
| M0                                      | 124    | 100   | 711    | 100   | 513    | 100   | 546    | 100   | 99     | 100   | 533    | 100   | 487    | 100   | 116    | 100   | 3      | 100   | 0      | 0     | 0      | 0     | 3132   | 97    |
| M1a                                     | 0      | 0     | 0      | 0     | 0      | 0     | 0      | 0     | 0      | 0     | 0      | 0     | 0      | 0     | 0      | 0     | 0      | 0     | 41     | 44.1  | 0      | 0     | 41     | 1.3   |
| M1b                                     | 0      | 0     | 0      | 0     | 0      | 0     | 0      | 0     | 0      | 0     | 0      | 0     | 0      | 0     | 0      | 0     | 0      | 0     | 52     | 55.9  | 0      | 0     | 52     | 1.6   |
| M1c                                     | 0      | 0     | 0      | 0     | 0      | 0     | 0      | 0     | 0      | 0     | 0      | 0     | 0      | 0     | 0      | 0     | 0      | 0     | 0      | 0     | 3      | 100   | 3      | 0.1   |
| LCCS                                    |        |       |        |       |        |       |        |       |        |       |        |       |        |       |        |       |        |       |        |       |        |       |        |       |
| Alive                                   | 121    | 97.6  | 657    | 92.4  | 470    | 91.6  | 478    | 87.5  | 91     | 91.9  | 413    | 77.5  | 321    | 65.9  | 66     | 56.9  | 1      | 33.3  | 47     | 50.5  | 1      | 33.3  | 2666   | 82.6  |
| dead                                    | 3      | 2.4   | 54     | 7.6   | 43     | 8.4   | 68     | 12.5  | 8      | 8.1   | 120    | 22.5  | 166    | 34.1  | 50     | 43.1  | 2      | 66.7  | 46     | 49.5  | 2      | 66.7  | 562    | 17.4  |
| Pleural/Elastic Layer Invasion          |        |       |        |       |        |       |        |       |        |       |        |       |        |       |        |       |        |       |        |       |        |       |        |       |
| PL0                                     | 124    | 100   | 711    | 100   | 513    | 100   | 315    | 57.7  | 99     | 100   | 405    | 76    | 360    | 73.9  | 80     | 69    | 2      | 66.7  | 66     | 71    | 1      | 33.3  | 2676   | 82.9  |
| PL1                                     | 0      | 0     | 0      | 0     | 0      | 0     | 133    | 24.4  | 0      | 0     | 47     | 8.8   | 50     | 10.3  | 10     | 8.6   | 0      | 0     | 8      | 8.6   | 1      | 33.3  | 249    | 7.7   |
| PL2                                     | 0      | 0     | 0      | 0     | 0      | 0     | 98     | 17.9  | 0      | 0     | 37     | 6.9   | 52     | 10.7  | 17     | 14.7  | 1      | 33.3  | 15     | 16.1  | 1      | 33.3  | 221    | 6.8   |
| PL3                                     | 0      | 0     | 0      | 0     | 0      | 0     | 0      | 0     | 0      | 0     | 44     | 8.3   | 25     | 5.1   | 9      | 7.8   | 0      | 0     | 4      | 4.3   | 0      | 0     | 82     | 2.5   |
| Separate Tumor Nodules                  |        |       |        |       |        |       |        |       |        |       |        |       |        |       |        |       |        |       |        |       |        |       |        |       |
| 1                                       | 124    | 100   | 711    | 100   | 513    | 100   | 546    | 100   | 99     | 100   | 433    | 83.1  | 410    | 84.2  | 82     | 70.7  | 3      | 100   | 69     | 74.2  | 2      | 66.7  | 3002   | 93    |
| 2                                       | 0      | 0     | 0      | 0     | 0      | 0     | 0      | 0     | 0      | 0     | 0      | 0     | 36     | 7.4   | 10     | 8.6   | 0      | 0     | 10     | 10.8  | 1      | 33.3  | 57     | 1.8   |
| 3                                       | 0      | 0     | 0      | 0     | 0      | 0     | 0      | 0     | 0      | 0     | 90     | 16.9  | 28     | 5.7   | 23     | 19.8  | 0      | 0     | 10     | 10.8  | 0      | 0     | 151    | 4.7   |
| 4                                       | 0      | 0     | 0      | 0     | 0      | 0     | 0      | 0     | 0      | 0     | 0      | 0     | 13     | 2.7   | 1      | 0.9   | 0      | 0     | 4      | 4.3   | 0      | 0     | 18     | 0.6   |
| Surgery to Other Regional/Distant Sites |        |       |        |       |        |       |        |       |        |       |        |       |        |       |        |       |        |       |        |       |        |       |        |       |
| None                                    | 124    | 100   | 711    | 100   | 513    | 100   | 545    | 99.8  | 99     | 100   | 527    | 98.9  | 478    | 98.2  | 115    | 99.1  | 3      | 100   | 74     | 79.6  | 2      | 66.7  | 3181   | 98.5  |
| Distant                                 | 0      | 0     | 0      | 0     | 0      | 0     | 0      | 0     | 0      | 0     | 0      | 0     | 2      | 0.4   | 0      | 0     | 0      | 0     | 17     | 18.3  | 1      | 33.3  | 24     | 0.7   |
| Regional                                | 0      | 0     | 0      | 0     | 0      | 0     | 1      | 0.2   | 0      | 0     | 6      | 1.1   | 7      | 1.4   | 1      | 0.9   | 0      | 0     | 2      | 2.2   | 0      | 0     | 23     | 0.7   |

**eTable 4. Feature Component Weightings in the DeepSurv Model**

| Features                        | Weight       | Features                 | Weight       | Features                                                                 | Weight   |
|---------------------------------|--------------|--------------------------|--------------|--------------------------------------------------------------------------|----------|
| Age at diagnosis                | 0.5722479    | CS extension (2004+)=540 | 0.42365953   | Stage=3                                                                  | -0.0717  |
| CS tumor size (2004+)           | 0.6724694    | CS extension (2004+)=550 | 0.08433475   | Stage=4                                                                  | -0.07168 |
| Regional nodes examined (1988+) | -0.4995487   | CS extension (2004+)=560 | 0.13039102   | Stage=5                                                                  | -0.01987 |
| Regional nodes positive (1988+) | 0.7574372    | CS extension (2004+)=570 | 0.06113536   | Stage=6                                                                  | 0.041379 |
| Sex=1                           | -0.062900014 | CS extension (2004+)=590 | 0.22531554   | Stage=7                                                                  | 0.101898 |
| Sex=2                           | 0.1671767    | CS extension (2004+)=600 | 0.12043501   | Stage=8                                                                  | 0.093093 |
| Histologic Type ICD-O-3=0       | 0.055728845  | CS extension (2004+)=610 | -0.90538454  | Stage=9                                                                  | 0.104782 |
| Histologic Type ICD-O-3=1       | -0.048216447 | CS extension (2004+)=680 | -0.824522    | Stage=10                                                                 | 0.034815 |
| Histologic Type ICD-O-3=2       | 0.015860233  | CS extension (2004+)=700 | 0.16996412   | Stage=11                                                                 | 0.51159  |
| Histologic Type ICD-O-3=3       | -0.08446639  | CS extension (2004+)=705 | -0.9847599   | T8=1                                                                     | 0.209211 |
| Histologic Type ICD-O-3=4       | 0.0417398    | CS extension (2004+)=710 | 0.3103478    | T8=2                                                                     | 0.038959 |
| Histologic Type ICD-O-3=5       | -0.00887268  | CS extension (2004+)=730 | -0.20042646  | T8=3                                                                     | 0.056467 |
| Histologic Type ICD-O-3=6       | 0.025923487  | CS extension (2004+)=740 | 0.81883913   | T8=4                                                                     | 0.049242 |
| Histologic Type 2=1             | -0.028282069 | CS extension (2004+)=745 | 0.40200815   | T8=5                                                                     | 0.06238  |
| Histologic Type 2=2             | 0.020090567  | CS extension (2004+)=750 | 0.16024342   | T8=6                                                                     | -0.09599 |
| Grade=1                         | -0.002670259 | CS extension (2004+)=770 | -0.86313397  | T8=7                                                                     | -0.12861 |
| Grade=2                         | 0.063437365  | CS extension (2004+)=785 | -0.17053518  | N8=1                                                                     | -0.06939 |
| Grade=3                         | 0.15810749   | CS mets at dx (2004+)=0  | -0.07108595  | N8=2                                                                     | 0.052847 |
| Grade=4                         | -0.124901354 | CS mets at dx (2004+)=15 | 0.14313275   | N8=3                                                                     | 0.070122 |
| RX Summ--Scope Reg LN Sur (2003 | -0.05786139  | CS mets at dx (2004+)=16 | 0.08157881   | N8=4                                                                     | 0.202186 |
| RX Summ--Scope Reg LN Sur (2003 | 0.029179208  | CS mets at dx (2004+)=17 | -0.34559816  | M8=1                                                                     | -0.21266 |
| RX Summ--Scope Reg LN Sur (2003 | 0.020770853  | CS mets at dx (2004+)=18 | 0.059344094  | M8=2                                                                     | -0.02519 |
| RX Summ--Scope Reg LN Sur (2003 | -0.03520994  | CS mets at dx (2004+)=20 | -0.12556794  | M8=3                                                                     | 0.030704 |
| CS extension (2004+)=100        | -0.0725175   | CS mets at dx (2004+)=21 | 0.99101025   | M8=4                                                                     | 0.576268 |
| CS extension (2004+)=110        | 0.04731824   | CS mets at dx (2004+)=23 | -0.19575515  | Marital status at diagnosis=0                                            | 0.034368 |
| CS extension (2004+)=115        | 0.026038347  | CS mets at dx (2004+)=24 | -0.037997384 | Marital status at diagnosis=1                                            | -0.10559 |
| CS extension (2004+)=120        | 0.004864246  | CS mets at dx (2004+)=25 | -0.76219594  | Lung - Pleural/Elastic Layer Invasion (PL) by H and E or Elastic Stain=0 | 0.001433 |
| CS extension (2004+)=125        | -0.09474413  | CS mets at dx (2004+)=26 | 0.90065193   | Lung - Pleural/Elastic Layer Invasion (PL) by H and E or Elastic Stain=1 | 0.034629 |
| CS extension (2004+)=200        | 0.021685144  | CS mets at dx (2004+)=30 | -0.18796362  | Lung - Pleural/Elastic Layer Invasion (PL) by H and E or Elastic Stain=2 | 0.001899 |
| CS extension (2004+)=210        | -0.16040157  | CS mets at dx (2004+)=32 | 0.6542427    | Lung - Pleural/Elastic Layer Invasion (PL) by H and E or Elastic Stain=3 | 0.164463 |
| CS extension (2004+)=220        | -0.10082796  | CS mets at dx (2004+)=33 | -1.1801782   | Lung - Separate Tumor Nodules - Ipsilateral Lung=1                       | -0.03875 |
| CS extension (2004+)=230        | -0.21979994  | CS mets at dx (2004+)=36 | 0.88033414   | Lung - Separate Tumor Nodules - Ipsilateral Lung=2                       | 0.063924 |
| CS extension (2004+)=300        | -0.033153117 | CS mets at dx (2004+)=37 | -0.1698591   | Lung - Separate Tumor Nodules - Ipsilateral Lung=3                       | 0.042076 |
| CS extension (2004+)=400        | -0.029358057 | CS mets at dx (2004+)=40 | 0.14898834   | Lung - Separate Tumor Nodules - Ipsilateral Lung=4                       | 0.150139 |
| CS extension (2004+)=410        | -0.102100626 | CS mets at dx (2004+)=41 | 0.5691616    | Lung - Surgery to Primary Site (1988-2015)=1                             | 0.005233 |
| CS extension (2004+)=420        | -0.07669448  | CS mets at dx (2004+)=42 | 0.032155376  | Lung - Surgery to Primary Site (1988-2015)=2                             | -0.13327 |
| CS extension (2004+)=430        | 0.057814617  | CS mets at dx (2004+)=43 | 0.030705813  | Lung - Surgery to Primary Site (1988-2015)=3                             | -0.03041 |
| CS extension (2004+)=440        | 0.22026922   | CS mets at dx (2004+)=51 | 0.6830787    | Lung - Surgery to Primary Site (1988-2015)=4                             | 0.141988 |
| CS extension (2004+)=455        | -0.01990803  | CS mets at dx (2004+)=52 | 1            | Lung - Surgery to Other Regional/Distant Sites (1998+)=1                 | -0.04313 |
| CS extension (2004+)=460        | -0.061044298 | CS mets at dx (2004+)=53 | 0.6274554    | Lung - Surgery to Other Regional/Distant Sites (1998+)=2                 | 0.117256 |
| CS extension (2004+)=465        | 0.56912345   | CS mets at dx (2004+)=70 | -0.58639836  | Lung - Surgery to Other Regional/Distant Sites (1998+)=3                 | 0.06074  |
| CS extension (2004+)=500        | -0.10761972  | Stage=1                  | -0.4348911   |                                                                          |          |
| CS extension (2004+)=520        | 0.20671241   | Stage=2                  | -0.15681928  |                                                                          |          |

**eTable 5.** Survival Predictors in Cox PH Model

| Variables                                                            | HR    | 95% CI      | $\beta$ | P value |
|----------------------------------------------------------------------|-------|-------------|---------|---------|
| Age at diagnosis                                                     | 1.022 | 1.017-1.026 | 0.022   | <0.001  |
| Sex                                                                  | 1.429 | 1.310-1.558 | 0.357   | <0.001  |
| Histologic                                                           | 1.151 | 1.053-1.258 | 0.141   | 0.002   |
| Grade                                                                | 0.911 | 0.869-0.955 | -0.093  | <0.001  |
| RX Summ-Scope Reg LN Sur (2003+)                                     | 0.895 | 0.825-0.972 | -0.111  | 0.008   |
| CS tumor size (2004+)                                                | 1.009 | 1.006-1.011 | 0.009   | <0.001  |
| CS extension (2004+)                                                 | 1.039 | 1.008-1.071 | 0.039   | 0.013   |
| CS mets at dx (2004+)                                                | 0.973 | 0.948-0.999 | -0.027  | 0.039   |
| Regional nodes examined (1988+)                                      | 0.987 | 0.981-0.992 | -0.013  | <0.001  |
| Regional nodes positive (1988+)                                      | 1.053 | 1.035-1.071 | 0.051   | <0.001  |
| Stage                                                                | 1.272 | 1.214-1.334 | 0.241   | 0.001   |
| T stage                                                              | 0.926 | 0.881-0.974 | -0.076  | 0.003   |
| N stage                                                              | 1.148 | 1.055-1.248 | 0.138   | 0.001   |
| M stage                                                              | 2.066 | 1.240-3.443 | 0.726   | 0.005   |
| Marital status                                                       | 0.791 | 0.727-0.861 | -0.234  | <0.001  |
| Lung-Pleural/Elastic Layer Invasion (PL) by H and E or Elastic Stain | 1.109 | 1.044-1.179 | 0.104   | 0.001   |

Cox PH: Cox proportional hazard regression; HR: Hazard Ratio; CI: Confidence Interval.  
 $H_x = 0.022 * \text{Age at diagnosis} + 0.357 * \text{Sex} + 0.141 * \text{Histologic-Grade} - 0.093 - 0.111 * \text{RX Summ-Scope Reg LN Sur (2003+)} + 0.009 * \text{CS tumor size (2004+)} + 0.039 * \text{CS extension (2004+)} - 0.027 * \text{CS mets at dx (2004+)} - 0.013 * \text{Regional nodes examined (1988+)} + 0.051 * \text{Regional nodes positive (1988+)} + 0.241 * \text{Stage} - 0.076 * \text{T stage} + 0.138 * \text{N stage} + 0.726 * \text{M stage} - 0.234 * \text{Marital status} + 0.104 * \text{Lung - Pleural/Elastic Layer Invasion (PL) by H and E or Elastic Stain}.$



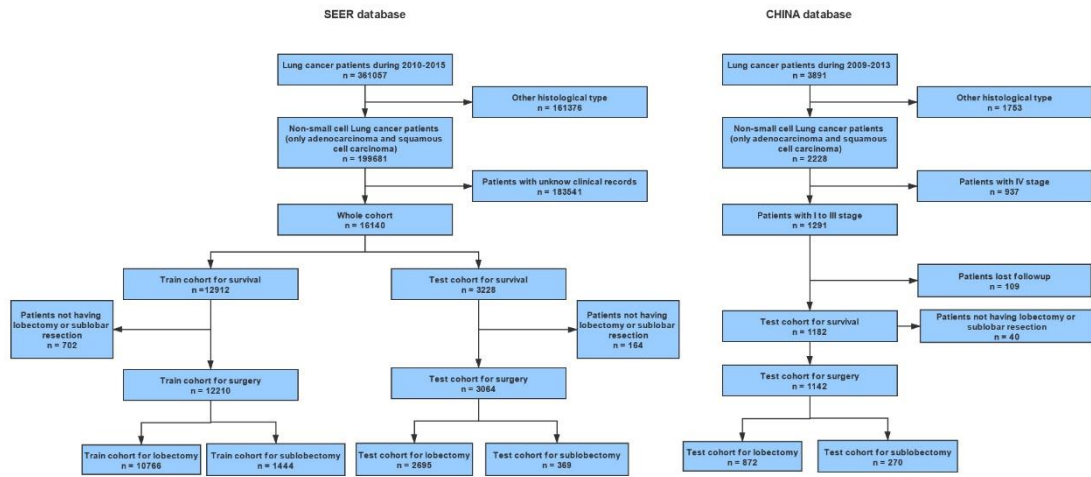

**eFigure 1.** Flow chart of datasets construction. (A) SEER dataset, (B) CHINA dataset

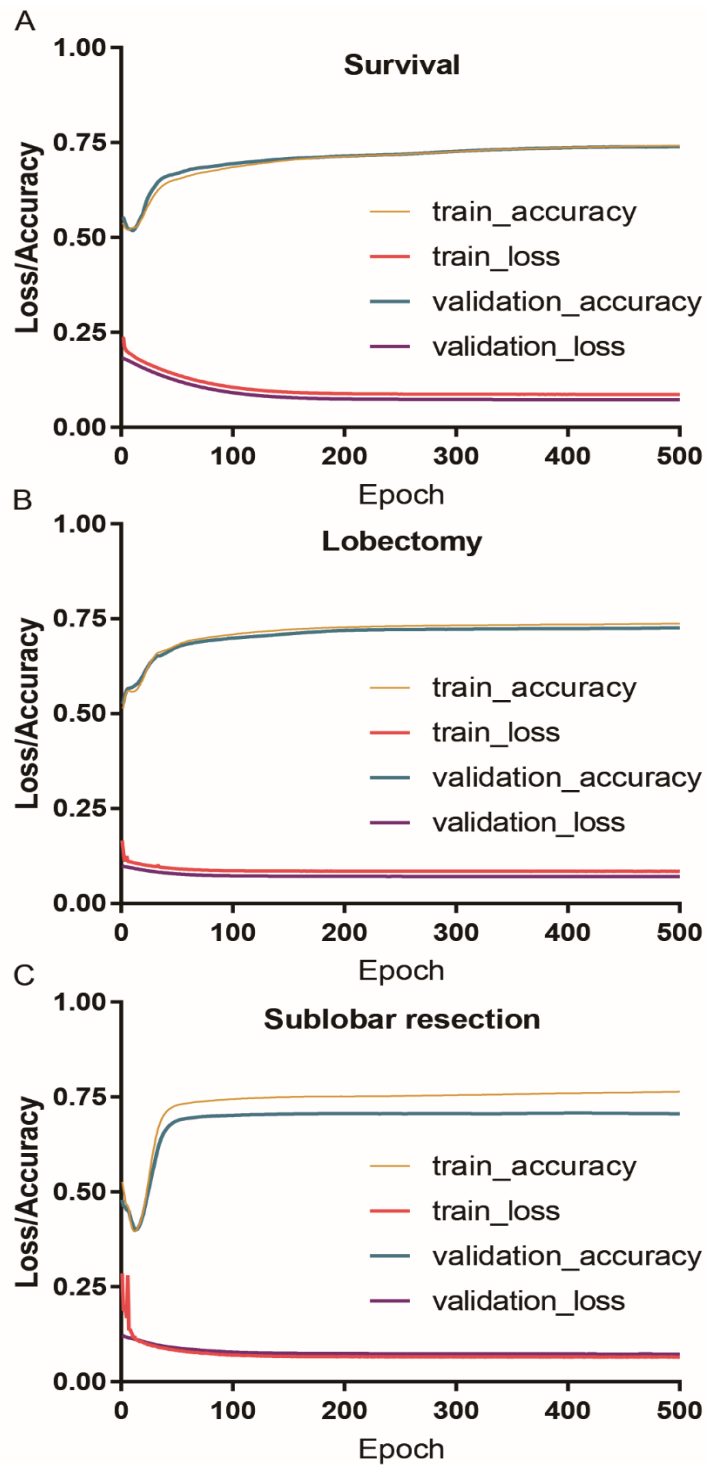

**eFigure 2.** Training curves of networks in the survival dataset of SEER database (A), lobectomy dataset (B), and sublobar resection dataset (C). The red and purple curves indicate loss of the training and test datasets, respectively; the blue and yellow curves indicate the accuracy of the training and test datasets, respectively.

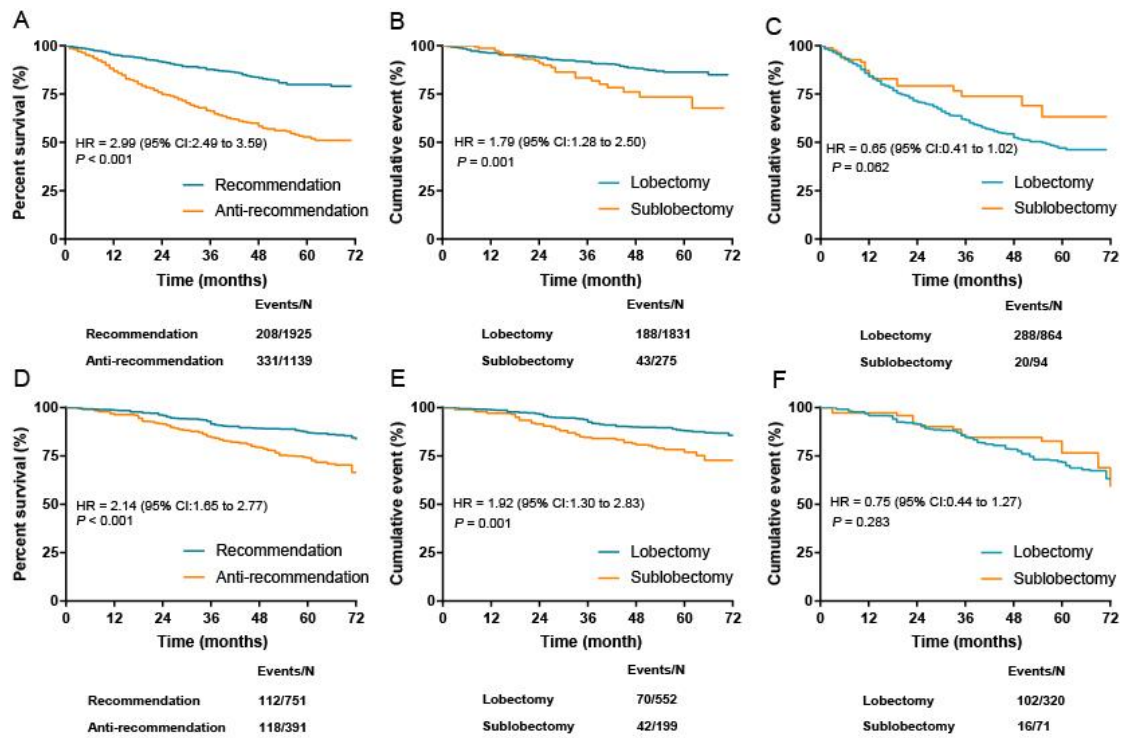

**eFigure 3.** Lung cancer–specific survival recommendation comparisons of SEER dataset (A), SEER lobectomy test dataset (B), and SEER sublobar resection test dataset (C); Lung cancer–specific survival recommendation comparisons of CHINA dataset (D), CHINA lobectomy test dataset (E), and CHINA sublobar resection test dataset (F).
